# Supplementary material
Source: publisher figshare collection journal article supplement (https://asha.figshare.com/articles/dataset/_/17003980)
Supplement: Supplementary file 1 [file 1]

## Supplemental Material S2. Support system developed by the Ministry to cater for children under their inclusive education policy.

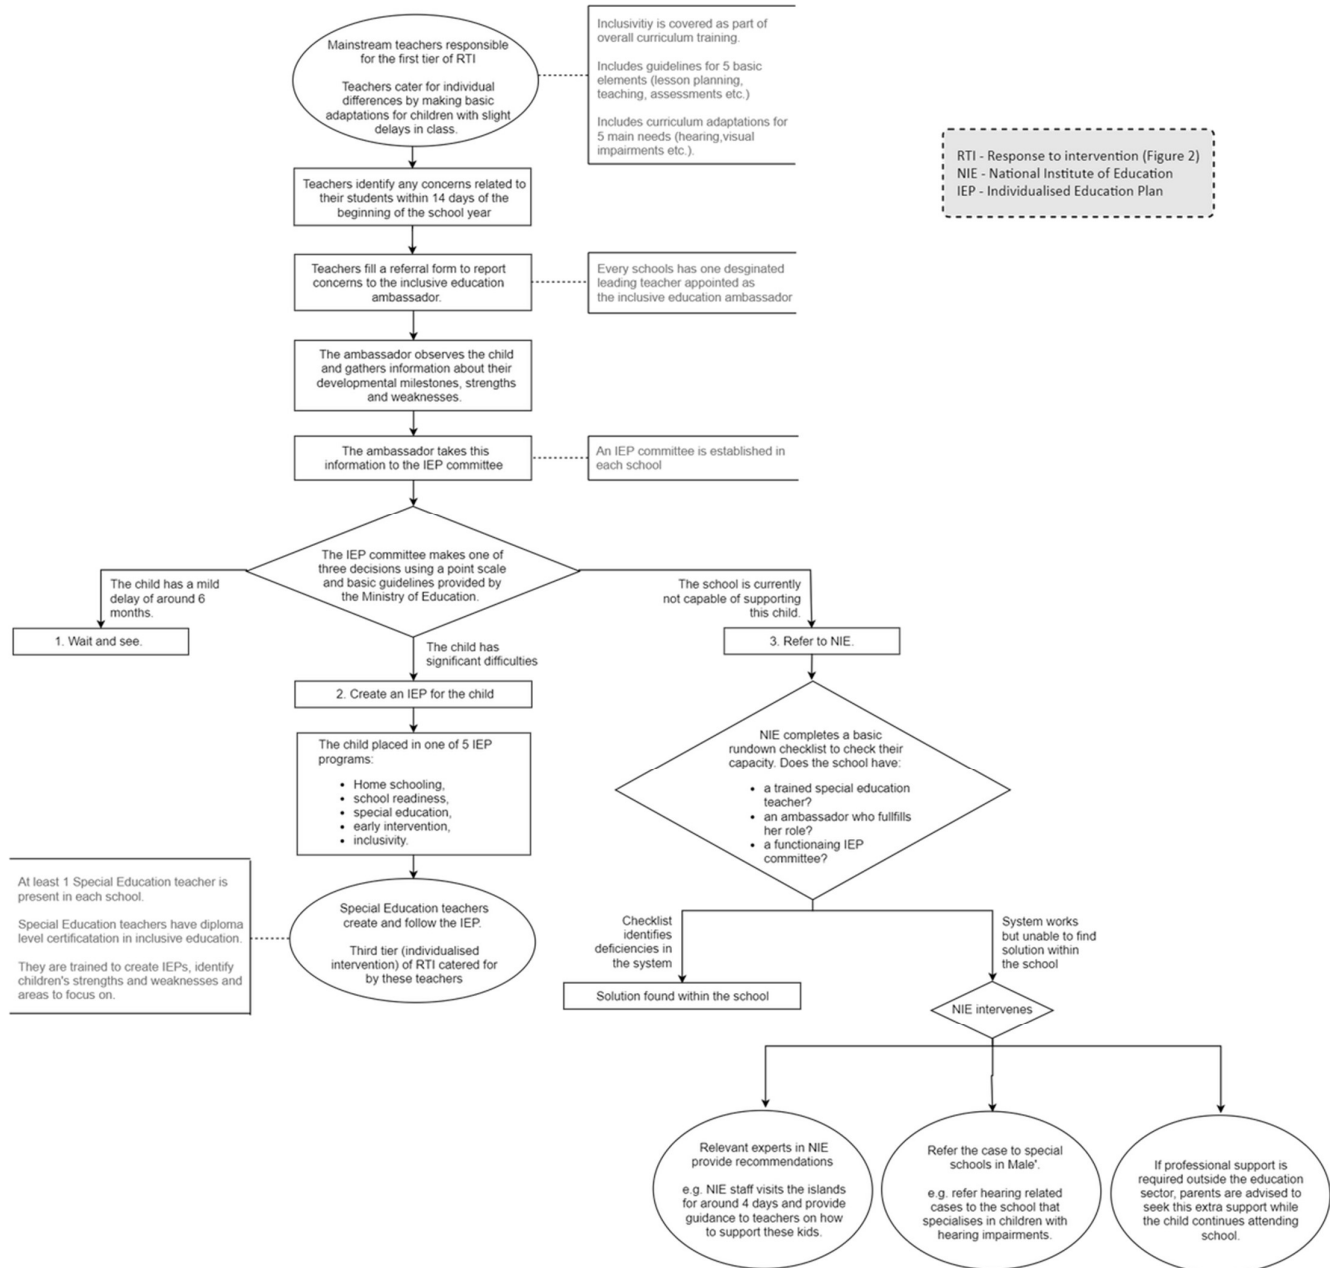

*Note.* Created from the information gathered through the interview with Ministry of Education official.
