# Supplementary material
Source: publisher figshare collection journal article supplement (https://asha.figshare.com/articles/dataset/_/17003980)
Supplement: Supplementary file 2 [file 1]

## **Supplemental Material S1. Interview guides.**

### ***Ministry of Education official interview guide***

1. What kind of assistance or services does the Ministry of Education provide for school children with special education needs?
  - a. What about children with communication difficulties specifically? (environmental)
  - b. What about training, professional development, resources to train teachers and resources to teach students? (environmental/economic)
  - c. What about financial support for travel? (economic)
    - i. For families to access services
    - ii. For professionals to visit
  - d. Any other services that are available? (environmental)
    - i. Professionals? Unskilled? (e.g., volunteers, other informal support that people use).
  - e. Where are these services available? (environmental)
  - f. Can you tell me more about the Special Education Needs (SEN) teachers’ work across the country? (social)
    - i. What are the things that are involved in SEN units?
    - ii. What about support to mainstream teachers?
2. Are there places where Ministry of Education’s special education supports work well? (environmental/social)
  - a. Are there places where this is a challenge to meet these curriculum needs?
3. Have there been any recent initiatives and improvements in services offered by the Ministry of Education for children with communication difficulties? (environmental/economic)
4. What are the Ministry’s challenges or priorities for improvements for school children with special education needs? (environmental/social/economic)
  - a. What challenges or priorities for improvements specifically for communication difficulties?

### ***Special education needs teacher interview topic guide***

1. Tell me what it’s like being a teacher. (social)
  - a. What are the things that are involved?
  - b. What are some things you like about it?
  - c. What are some things you don’t like as much?
2. Tell me what it’s like working with children with communication difficulties?
  - a. What kind of assistance or services do you get? (environmental)
    - i. What about training, professional development, and resources to teach these children?
  - b. What challenges do you face when you are teaching children with communication difficulties? (environmental/economic)
  - c. What is life like for families of children with communication difficulties here?
    - i. What support do you think they get? (Direct or indirect therapy, financial support for travel or therapy, etc.) (environmental/economic)

- ii. What challenges do they face? (environmental/economic)
- 3. What would you like to see happen for children with special education needs in your school? (environmental/social/economic)
  - a. What about children with speech or language needs, especially?

Additional incidental questions are likely to come up following observations, e.g., related to things that happened in class, activities carried out, resources available, and more. e.g., “I noticed when I was in your class that you used the computers for ... Do you find this helpful?”
